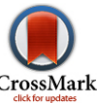

## Correction

# Correction: The Burden of Eclampsia: Results from a Multicenter Study on Surveillance of Severe Maternal Morbidity in Brazil

The *PLOS ONE* Staff

## Notice of Republication

This article was republished on June 10, 2014, to replace copyrighted or confidential material and to update the funding statement. Please download the article again to view the corrected version.

## Reference

1. Giordano JC, Parpinelli MA, Cecatti JG, Haddad SM, Costa ML, et al. (2014) The Burden of Eclampsia: Results from a Multicenter Study on Surveillance of Severe Maternal Morbidity in Brazil. *PLoS ONE* 9(5): e97401. doi:10.1371/journal.pone.0097401

**Citation:** The *PLOS ONE* Staff (2014) Correction: The Burden of Eclampsia: Results from a Multicenter Study on Surveillance of Severe Maternal Morbidity in Brazil. *PLoS ONE* 9(7): e102208. doi:10.1371/journal.pone.0102208

**Published:** July 1, 2014

**Copyright:** © 2014 The *PLOS ONE* Staff. This is an open-access article distributed under the terms of the Creative Commons Attribution License, which permits unrestricted use, distribution, and reproduction in any medium, provided the original author and source are credited.
